# Supplementary material
Source: MDPI journal article supplement (https://www.mdpi.com/2071-1050/14/17/10702)

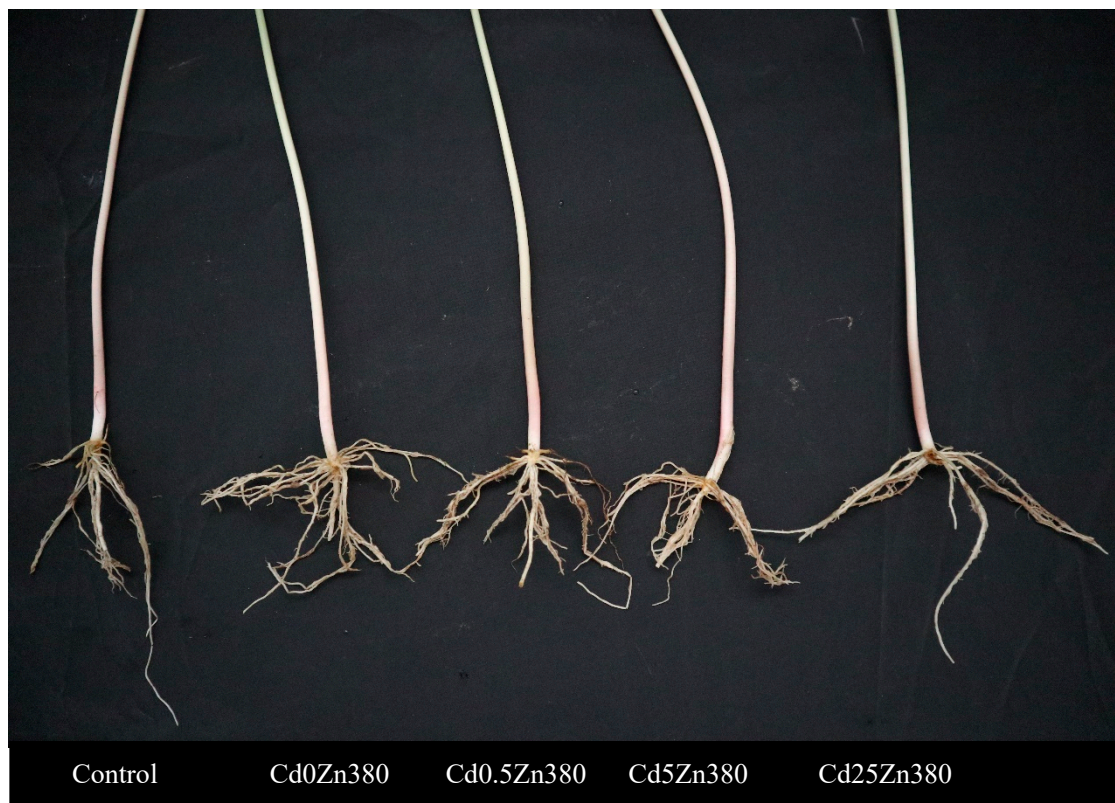

Figure S1. Root morphology of castor seedling roots in different treatment groups.

Supplement: s1 [file s1]
